# Supplementary material for: Genome-wide association study of yield and related traits in common wheat under salt-stress conditions
Source: PubMed Central journal article supplement (PMC7792188; doi:10.1186/s12870-020-02799-1), 2021-01-07

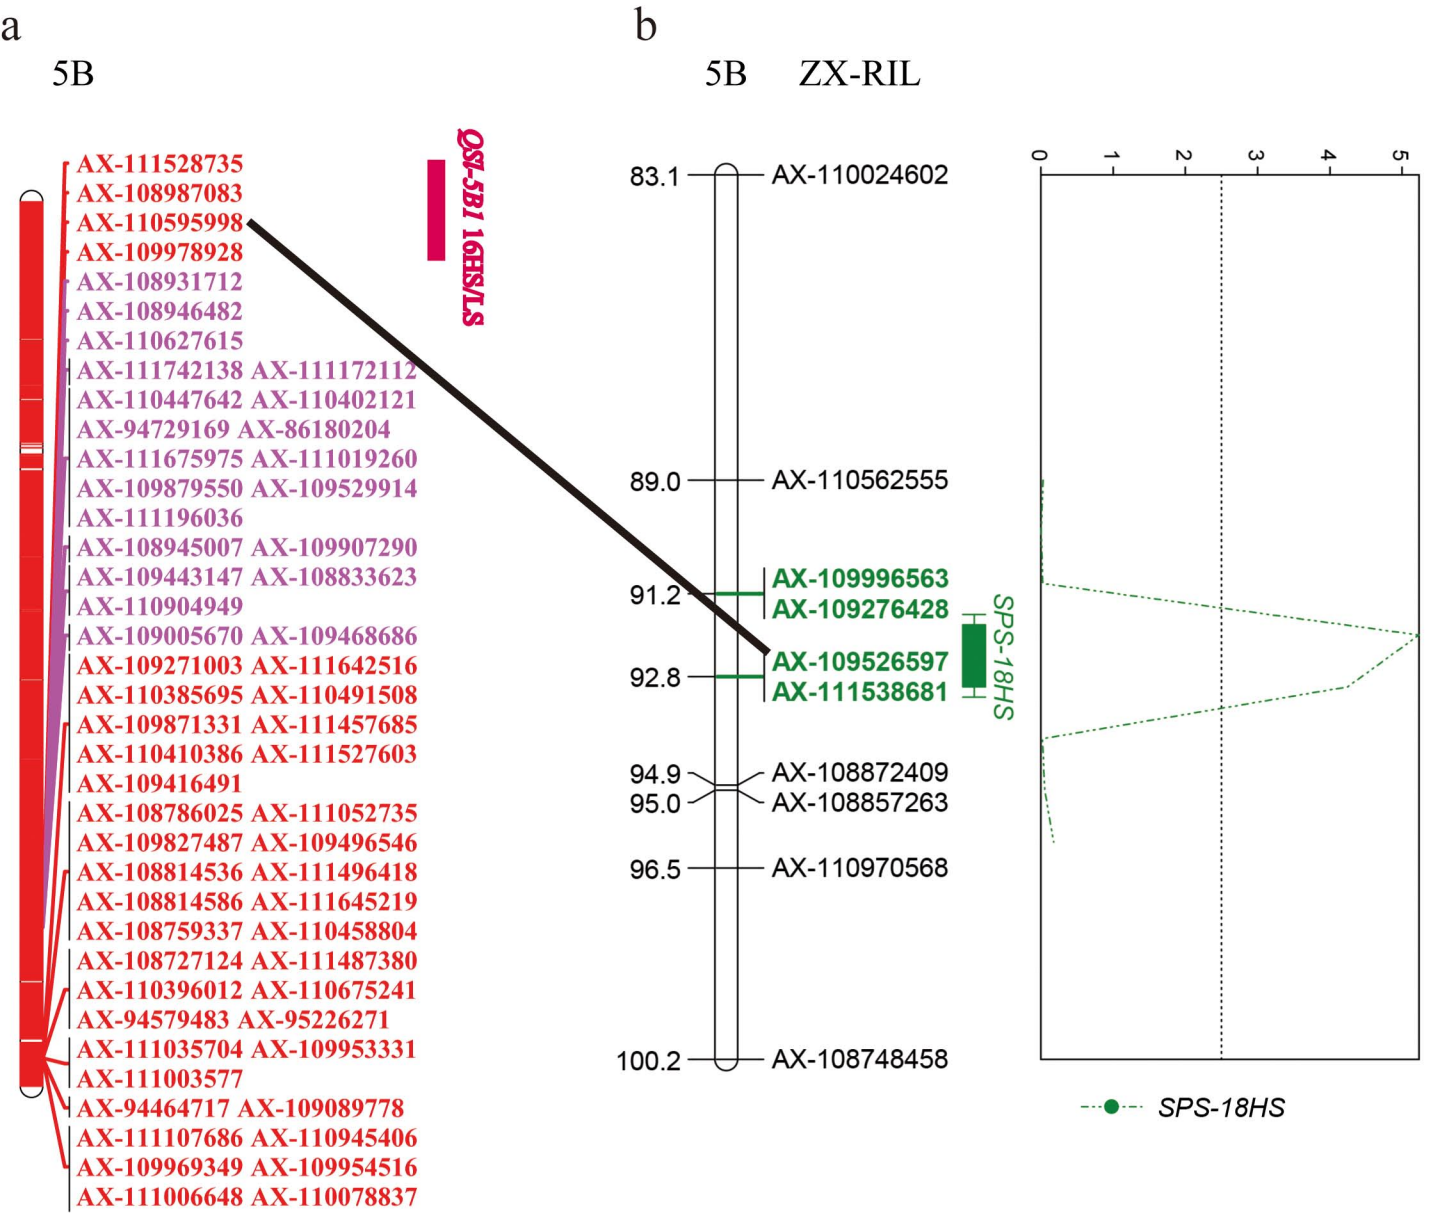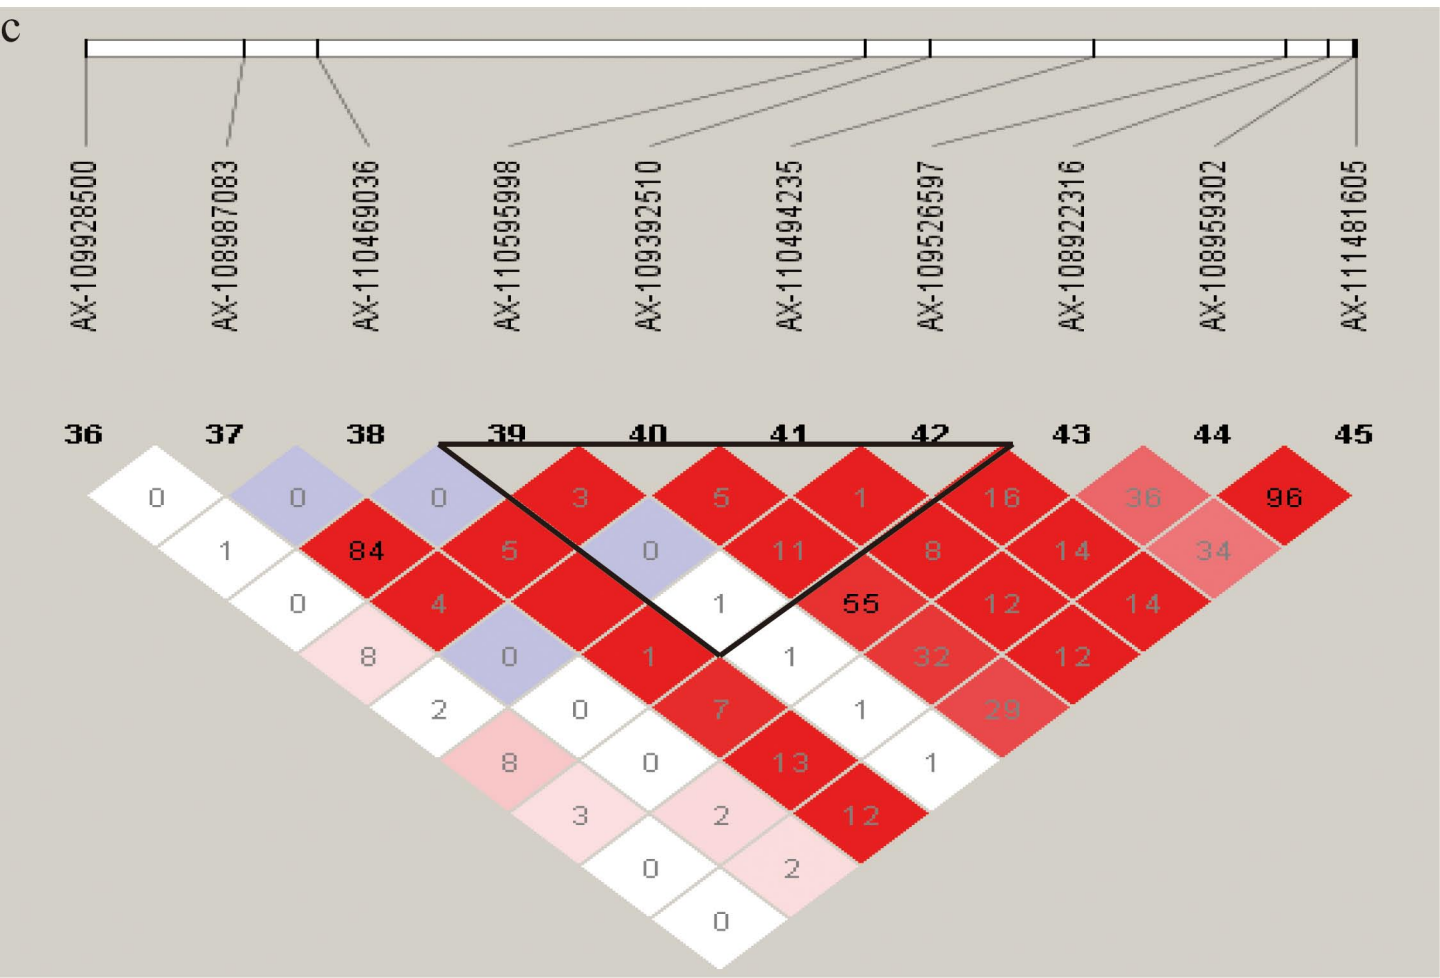

Supplement: 12870_2020_2799_MOESM11_ESM.pdf [file 12870_2020_2799_MOESM11_ESM.pdf]
